# Supplementary material for: Macrophages of genetically characterized familial hypercholesterolaemia patients show up‐regulation of LDL‐receptor‐related proteins
Source: PubMed Central journal article supplement (PMC5323824; doi:10.1111/jcmm.12993), 2016-09-29
Supplement: JCMM-21-487-s001.pdf [file JCMM-21-487-s001.pdf]

**MACROPHAGES OF GENETICALLY CHARACTERIZED FAMILIAL  
HYPERCHOLESTEROLEMIA PATIENTS SHOW UPREGULATION OF  
LDL-RECEPTOR RELATED PROTEINS**

**Rafael Escate <sup>a</sup>, Teresa Padro <sup>a</sup>, Maria Borrell-Pages <sup>a</sup>, Rosa Suades <sup>a</sup>,  
Rosa Aledo <sup>a</sup>, Pedro Mata <sup>c</sup>, Lina Badimon <sup>a,b,\*</sup>**

<sup>a</sup> Cardiovascular Research Center (CSIC-ICCC), IIB-Sant Pau, Barcelona, Spain;

<sup>b</sup> Cardiovascular Research Chair, UAB, Barcelona, Spain

<sup>c</sup> Foundation Jimenez Diaz, Madrid, Spain

**\*Correspondence to:** Prof. Lina Badimon  
Cardiovascular Research Center  
Hospital de la Santa Creu I Sant Pau,  
IIB-Sant Pau, Barcelona, Spain.  
Sant Antoni Maria Claret 167, 08025 Barcelona, Spain.  
**Phone:** +34.935565880.  
**Fax:** +34.935565559.  
**E-mail:** [lbadimon@csic-iccc.org](mailto:lbadimon@csic-iccc.org)

Supporting Information: 4 Supplementary Figures and 4 Supplementary Tables

**Familial hypercholesterolemia  
SAFEHEART cohort  
(N=205)**

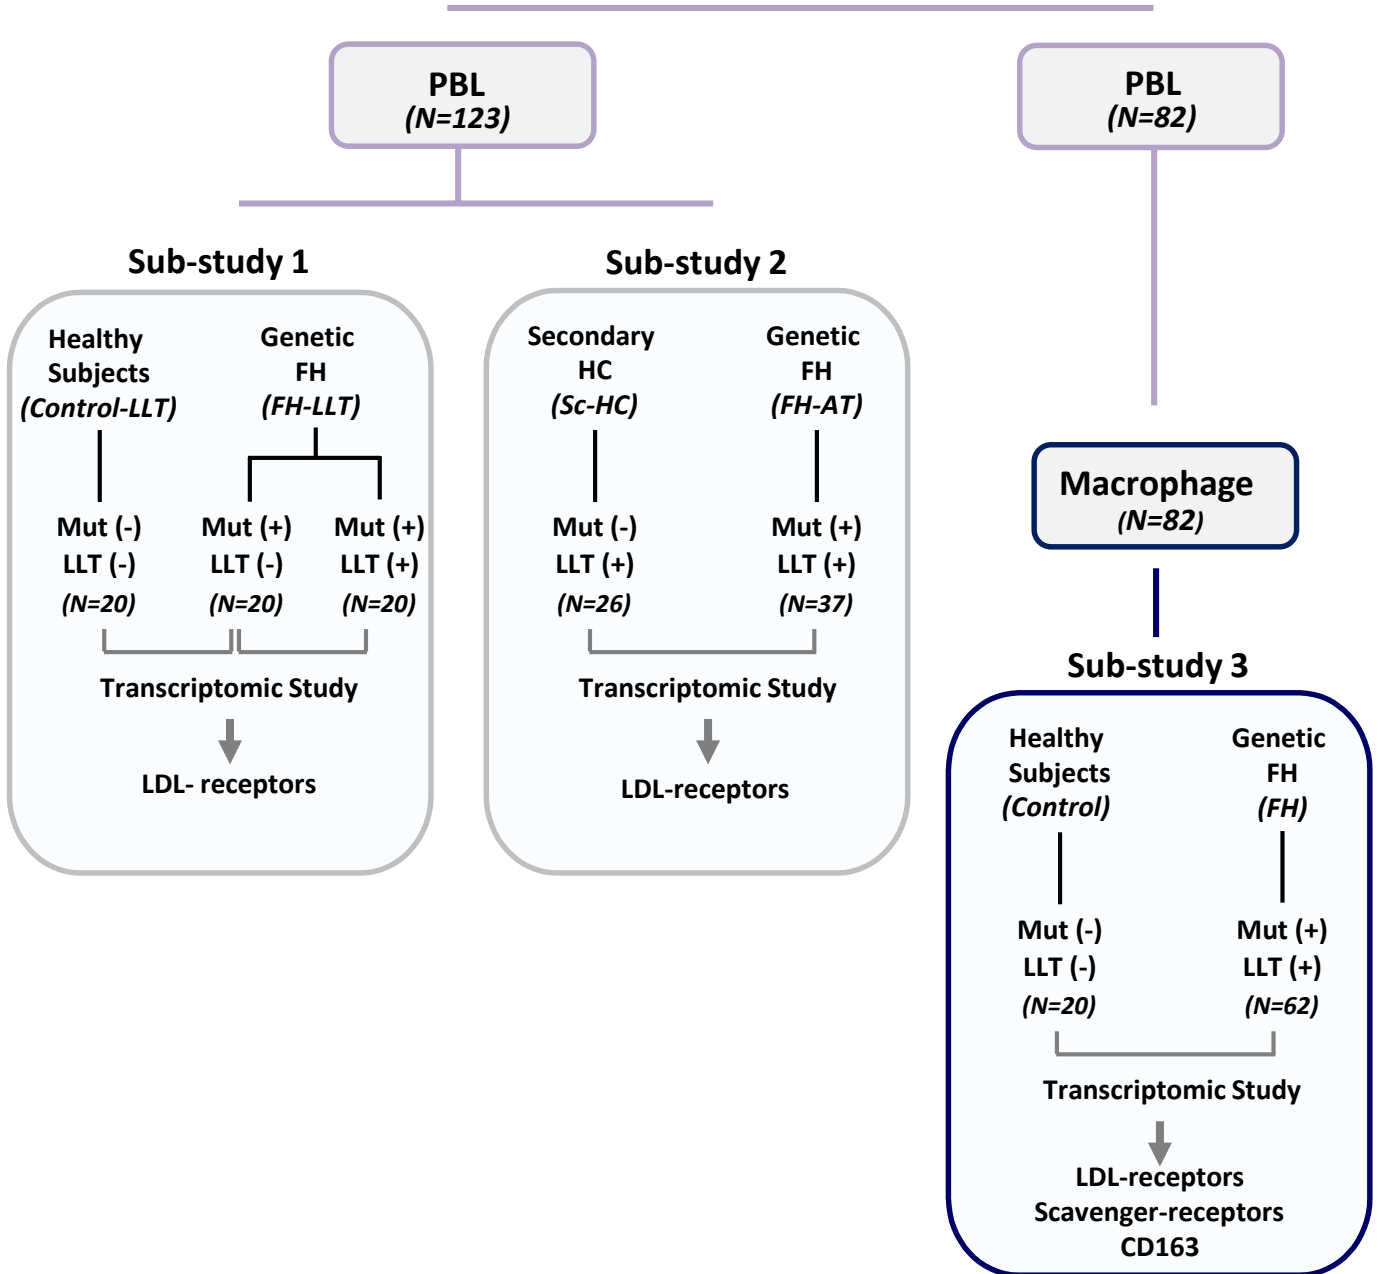

**Supplementary Figure 1. Schematic diagram representing the study design with 205 subjects of the SAFEHEART Cohort**

FH: Familial hypercholesterolemia; HC: hypercholesterolemia; Mut (+): With LDLR mutation, Mut (-): Without LDLR mutation; LLT (+): with lipid-lowering treatment; LLT (-): without lipid-lowering treatment. Secondary HC is shown in manuscript as sc-HC.

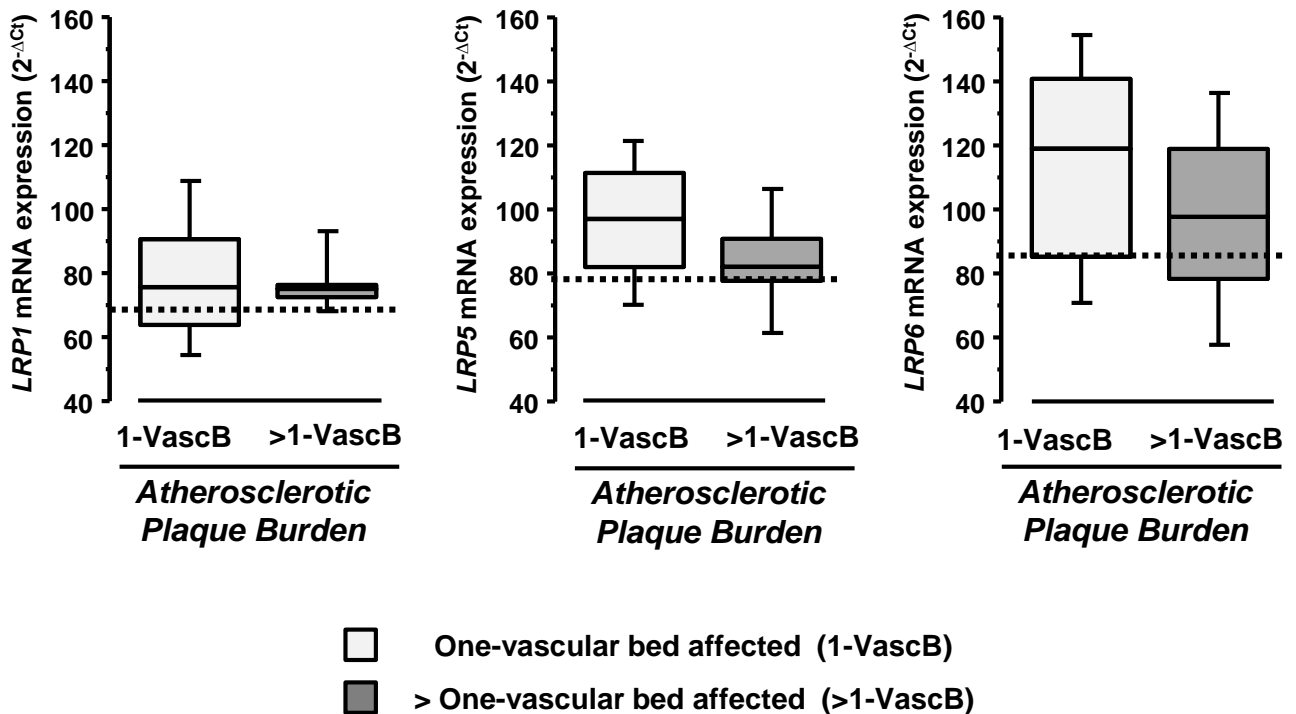

### Supplementary Figure 2. LRP5 expression in PBL from FH-AT patients

Box and whisker plot of LRP1, LRP5 and LRP6 mRNA expression associated to atherosclerotic plaque burden in FH-patients. Horizontal dotted lines indicate median levels of mRNA expression ( $2^{-\Delta C_t}$ ) of the control sc-HC group for LRP1 (68), LRP5 (79), and LRP6 (84). Thirty FH-AT patients only had one vascular bed affected (aortic or carotid) and 7 patients had atherosclerotic burden in the aortic and carotid beds. Values are given as median and interquartile range. Differences between groups are not statistically significant (U-Mann Whitney).

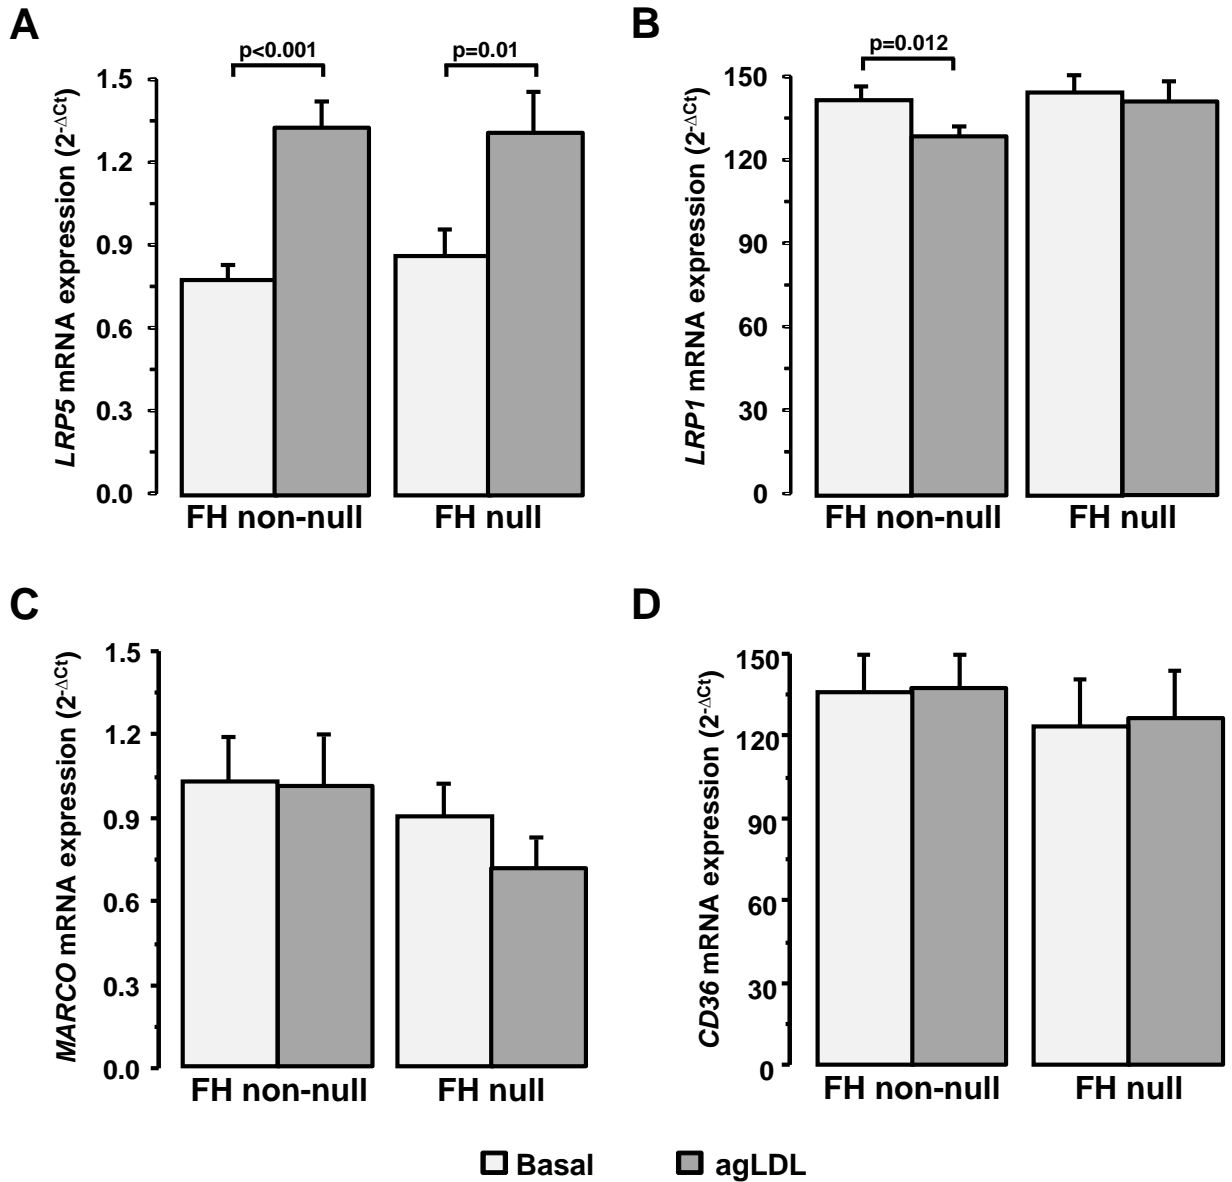

**Supplementary Figure 3. mRNA expression levels of LRP5 and scavenger receptors in macrophages of FH-patients according their genetically characterized *ldlr*-mutation.**

Macrophage from LDLR-non-null (FH non-null, N=40) and LDLR-null (FH null, N=22) FH-patients were incubated with 100µg/mL agLDL for 24 hours. mRNA expression was quantified by real time PCR in sample duplicates. Bars represent mean±SEM. Only p-values <0.05 are shown.

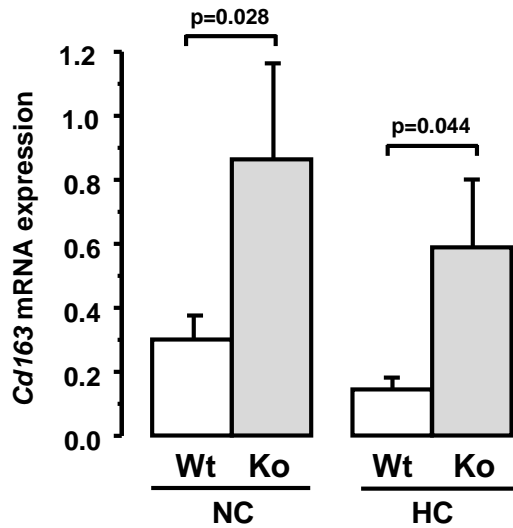

**Supplementary Figure 4. *Cd163* expression is upregulated in PBLs of *Lrp5*<sup>-/-</sup> mice.**

Differential expression of *Cd163* in PBLs of wild type (Wt) and *Lrp5*<sup>-/-</sup> (Ko) mice fed hypercholesterolemic (HC) and normocholesterolemic (NC) diet. Real-time PCR in duplicates and normalized to 18S (N= 7 mice/group). Bars represent mean±SEM. Only p-values <0.05 are shown.

**Supplementary Table 1. Clinical characteristics of Control-LLT<sup>-</sup>, FH-LLT<sup>+</sup> and FH-LLT<sup>-</sup> donors for studies on peripheral blood leukocytes (PBL).**

|                                                  | Control-LLT <sup>-</sup><br>n=20 | FH-LLT <sup>+</sup><br>n=20 | FH-LLT <sup>-</sup><br>n=20 | Statistics |
|--------------------------------------------------|----------------------------------|-----------------------------|-----------------------------|------------|
| Age (years, mean ± SEM)                          | 35 ± 2                           | 37 ± 2                      | 34 ± 1                      | p=0.501    |
| Male/Female, n                                   | 10/10                            | 10/10                       | 10/10                       | -          |
| Body mass index (Kg/m <sup>2</sup> , mean ± SEM) | 23.3 ± 0.9                       | 24.7 ± 1.1                  | 24.6 ± 0.9                  | p=0.646    |
| Waist to height ratio (mean ± SEM)               | 0.5 ± 0.3                        | 0.48 ± 0.2                  | 0.47 ± 0.1                  | p=0.973    |
| <b>Risk Factors, n(%)</b>                        |                                  |                             |                             |            |
| Diabetes mellitus                                | 0 (0%)                           | 0 (0%)                      | 0 (0%)                      | -          |
| Systemic hypertension                            | 0 (0%)                           | 0 (0%)                      | 0 (0%)                      | -          |
| Obesity (BMI>30)                                 | 1 (5%)                           | 3 (30%)                     | 2 (10%)                     | p=0.574    |
| Current tobacco consumption                      | 5 (25%)                          | 9 (45%)                     | 9 (45%)                     | p=0.324    |
| <b>Lipid-lowering therapy, n(%)</b>              |                                  |                             |                             |            |
| Statins                                          | 0 (0%)                           | 20 (100%)                   | 0 (0%)                      | p<0.001    |
| Ezetimibe                                        | 0 (0%)                           | 0 (0%)                      | 0 (0%)                      |            |
| Statin treatment time (years, mean ± SEM)        | 0                                | 15 ± 1                      | 0                           | p<0.001    |
| <b>Clinical data (mean ± SEM)</b>                |                                  |                             |                             |            |
| Total cholesterol (mg/dL)                        | 167.9 ± 4.2                      | 296.9 ± 7.5 <sup>a</sup>    | 302.9 ± 6.4 <sup>a</sup>    | p<0.001    |
| LDL-cholesterol (mg/dL)                          | 92.7 ± 3.4                       | 222.7 ± 6 <sup>a</sup>      | 231.3 ± 6.9 <sup>a</sup>    | p<0.001    |
| HDL-cholesterol (mg/dL)                          | 60.1 ± 4.3                       | 55.9 ± 3.4                  | 53.6 ± 2.4 <sup>a</sup>     | p=0.749    |
| Non-HDL-cholesterol (mg/dL)                      | 107.8 ± 3.3                      | 240.9 ± 7.1 <sup>a</sup>    | 249.3 ± 6.4 <sup>a</sup>    | p<0.001    |
| TC/HDL-cholesterol ratio                         | 2.8 ± 0.1                        | 5.6 ± 0.3 <sup>a</sup>      | 5.9 ± 0.3 <sup>a</sup>      | p<0.001    |
| Triglyceride (mg/dL)                             | 75.1 ± 8.1                       | 90.5 ± 10.1                 | 87.2 ± 8.6                  | p=0.251    |
| Hight-sensitive CRP (mg/dL)                      | 1.7 ± 0.4                        | 2.8 ± 0.9                   | 1.6 ± 0.3                   | p=0.701    |
| Fasting plasma glucose (mg/dL)                   | 82.4 ± 2.4                       | 77.9 ± 2.1                  | 79.1 ± 1.9                  | p=0.385    |

Control-LLT<sup>-</sup> group: healthy subjects without lipid-lowering therapy; FH-LLT<sup>+</sup> and FH-LLT<sup>-</sup> group: FH-patients with or without LLT; BMI: body mass index; LDL: low-density lipoprotein; HDL: high-density lipoprotein; TC: total cholesterol and CRP: C-reactive protein. <sup>a</sup> p-values respect to Control-LLT<sup>-</sup> group.

**Supplementary Table 2. Clinical characteristics of sc-HC and FH-AT donors for studies on peripheral blood leukocytes (PBL).**

|                                                  | sc-HC<br><i>n</i> =26 | FH-AT<br><i>n</i> =37 | Statistics |
|--------------------------------------------------|-----------------------|-----------------------|------------|
| Age (years, mean ± SEM)                          | 56 ± 3                | 44 ± 2                | p=0.001    |
| Male/Female, <i>n</i>                            | 10/16                 | 19/18                 | p=0.312    |
| Body mass index (Kg/m <sup>2</sup> , mean ± SEM) | 28.2 ± 1.3            | 26 ± 0.7              | p=0.138    |
| Waist to height ratio (mean ± SEM)               | 0.57 ± 0.2            | 0.50 ± 0.01           | p=0.004    |
| <b>Risk Factors, <i>n</i>(%)</b>                 |                       |                       |            |
| Diabetes mellitus                                | 2 (8%)                | 0 (0%)                | p=0.086    |
| Systemic hypertension                            | 5 (19%)               | 4 (11%)               | p=0.347    |
| Obesity (BMI>30)                                 | 10 (38%)              | 3 (8%)                | p=0.003    |
| Current tobacco consumption                      | 7 (27%)               | 13 (35%)              | p=0.491    |
| <b>Lipid-lowering therapy, <i>n</i>(%)</b>       |                       |                       |            |
| Statins                                          | 26 (100%)             | 37 (100%)             | -          |
| Ezetimibe                                        | 2 (8%)                | 13 (35%)              | p=0.012    |
| Statin treatment time (years, mean ± SEM)        | 12 ± 1                | 11 ± 1                | p=0.626    |
| <b>Clinical data (mean ± SEM)</b>                |                       |                       |            |
| Total cholesterol (mg/dL)                        | 212.5 ± 7.5           | 232.9 ± 12.6          | p=0.418    |
| LDL-cholesterol (mg/dL)                          | 136.2 ± 6.8           | 160.1 ± 10.7          | p=0.133    |
| HDL-cholesterol (mg/dL)                          | 56.4 ± 2.8            | 49.6 ± 2.1            | p=0.077    |
| Non-HDL-cholesterol (mg/dL)                      | 156 ± 7.2             | 182 ± 12.2            | p=0.176    |
| TC/HDL-cholesterol ratio                         | 3.9 ± 0.2             | 4.9 ± 0.3             | p=0.036    |
| Triglyceride (mg/dL)                             | 99.2 ± 9.5            | 39 ± 6.4              | p<0.001    |
| Hight-sensitive CRP (mg/dL)                      | 3.1 ± 0.9             | 2.9 ± 0.6             | p=0.469    |
| Fasting plasma glucose (mg/dL)                   | 92.3 ± 3.8            | 87.4 ± 3.2            | p=0.459    |

Sc-HC group: Subjects with secondary hypercholesterolemia and FH-AT group: FH-patients with atherosclerotic lesion analyzed with magnetic resonance image; BMI: body mass index; LDL: low-density lipoprotein; HDL: high-density lipoprotein; TC: total cholesterol and CRP: C-reactive protein.

**Supplementary Table 3. Clinical characteristics of control and FH donors for studies on monocyte differentiation to macrophage.**

|                                                      | <b>Control<br/>n=20</b> | <b>FH<br/>n=62</b> | <b>Statistics</b> |
|------------------------------------------------------|-------------------------|--------------------|-------------------|
| Age (years, mean $\pm$ SEM)                          | 47 $\pm$ 3              | 46 $\pm$ 2         | p=0.888           |
| Male/Female, n                                       | 11/9                    | 31/31              | p=0.697           |
| Body mass index (Kg/m <sup>2</sup> , mean $\pm$ SEM) | 25.6 $\pm$ 1.1          | 26.9 $\pm$ 0.7     | p=0.483           |
| Waist to height ratio (mean $\pm$ SEM)               | 0.53 $\pm$ 0.02         | 0.56 $\pm$ 0.01    | p=0.329           |
| <b>Risk Factors, n(%)</b>                            |                         |                    |                   |
| Diabetes mellitus                                    | 0 (0%)                  | 3 (4.8%)           | p=0.316           |
| Systemic hypertension                                | 1 (5%)                  | 6 (9.7%)           | p=0.515           |
| Obesity (BMI>30)                                     | 4 (20%)                 | 13 (21%)           | p=0.325           |
| Current tobacco consumption                          | 8 (40%)                 | 19 (30.6%)         | p=0.438           |
| <b>Lipid-lowering therapy, n(%)</b>                  |                         |                    |                   |
| Statins                                              | 9 (45%)                 | 62 (100%)          | p<0.001           |
| Ezetimibe                                            | 0 (0%)                  | 2 (1.2%)           | p=0.416           |
| Statin treatment time (years, mean $\pm$ SEM)        | 3 $\pm$ 1               | 15 $\pm$ 1         | p<0.001           |
| <b>Clinical data (mean <math>\pm</math> SEM)</b>     |                         |                    |                   |
| Total cholesterol (mg/dL)                            | 188.3 $\pm$ 4.6         | 243.6 $\pm$ 7.4    | p<0.001           |
| LDL-cholesterol (mg/dL)                              | 117.6 $\pm$ 4           | 176.7 $\pm$ 6.8    | p<0.001           |
| HDL-cholesterol (mg/dL)                              | 47.2 $\pm$ 2.6          | 49 $\pm$ 1.3       | p=0.496           |
| Non-HDL-cholesterol (mg/dL)                          | 141.1 $\pm$ 4           | 195 $\pm$ 7.4      | p<0.001           |
| TC/HDL-cholesterol ratio                             | 4.2 $\pm$ 0.2           | 5.2 $\pm$ 0.2      | p=0.003           |
| Triglyceride (mg/dL)                                 | 135.9 $\pm$ 23.6        | 89.3 $\pm$ 6.5     | p=0.063           |
| Hight-sensitive CRP (mg/dL)                          | 2.1 $\pm$ 0.4           | 1.5 $\pm$ 0.2      | p=0.457           |
| Fasting plasma glucose (mg/dL)                       | 80.2 $\pm$ 2.4          | 81.4 $\pm$ 1.7     | p=0.756           |

Control group (C-MAC): healthy subjects with or without lipid-lowering therapy (LLT); FH group (FH-MAC): FH patients with LLT; BMI: body mass index; LDL: low-density lipoprotein; HDL: high-density lipoprotein; TC: total cholesterol and CRP: C-reactive protein.



**Supplementary Table 4. FH genotypes according to location of LDLR mutation**

| <b>FH group</b> | <b>Location</b> | <b>Predicted effect</b>  | <b>N=62</b> |
|-----------------|-----------------|--------------------------|-------------|
| null            | Ex 15           |                          |             |
| null            | Ex 7            | Shift reading frame      | 10          |
| null            | Ex 6            |                          |             |
| null            | Ex 4            |                          |             |
| null            | Ex 9            | Stop codon               | 12          |
| null            | Ex 2            |                          |             |
| non-null        | Prom            | Regulation of expression | 4           |
| non-null        | Ex 17           |                          |             |
| non-null        | Ex 3            |                          |             |
| non-null        | Ex 4            | Change amino acid        | 15          |
| non-null        | Ex 7            |                          |             |
| non-null        | Ex 14           |                          |             |
| non-null        | Ex 8            |                          |             |
| non-null        | Int 3           |                          |             |
| non-null        | Int 16          | Splicing                 | 9           |
| non-null        | Int 9           |                          |             |
| non-null        | Int 12          |                          |             |
| non-null        | Ex 3 + Int 3    |                          |             |
| non-null        | Ex 13           | Others                   | 12          |
| non-null        | Ex 11 + Ex 17   |                          |             |
| non-null        | Ex 16           |                          |             |

Stop codon and shift reading frame mutations were classified as FH null (N=22) while the other mutations were classified as FH non-null (N=40). Ex: exon; Int: intron; Prom: promoter; N: number of patients for each predicted effect of LDLR mutation.
